# Supplementary material for: A defined subunit vaccine that protects against vector-borne visceral leishmaniasis
Source: PubMed Central journal article supplement (PMC5627294; doi:10.1038/s41541-017-0025-5), 2017-08-21
Supplement: 41541_2017_25_MOESM4_ESM.pdf [file 41541_2017_25_MOESM4_ESM.pdf]

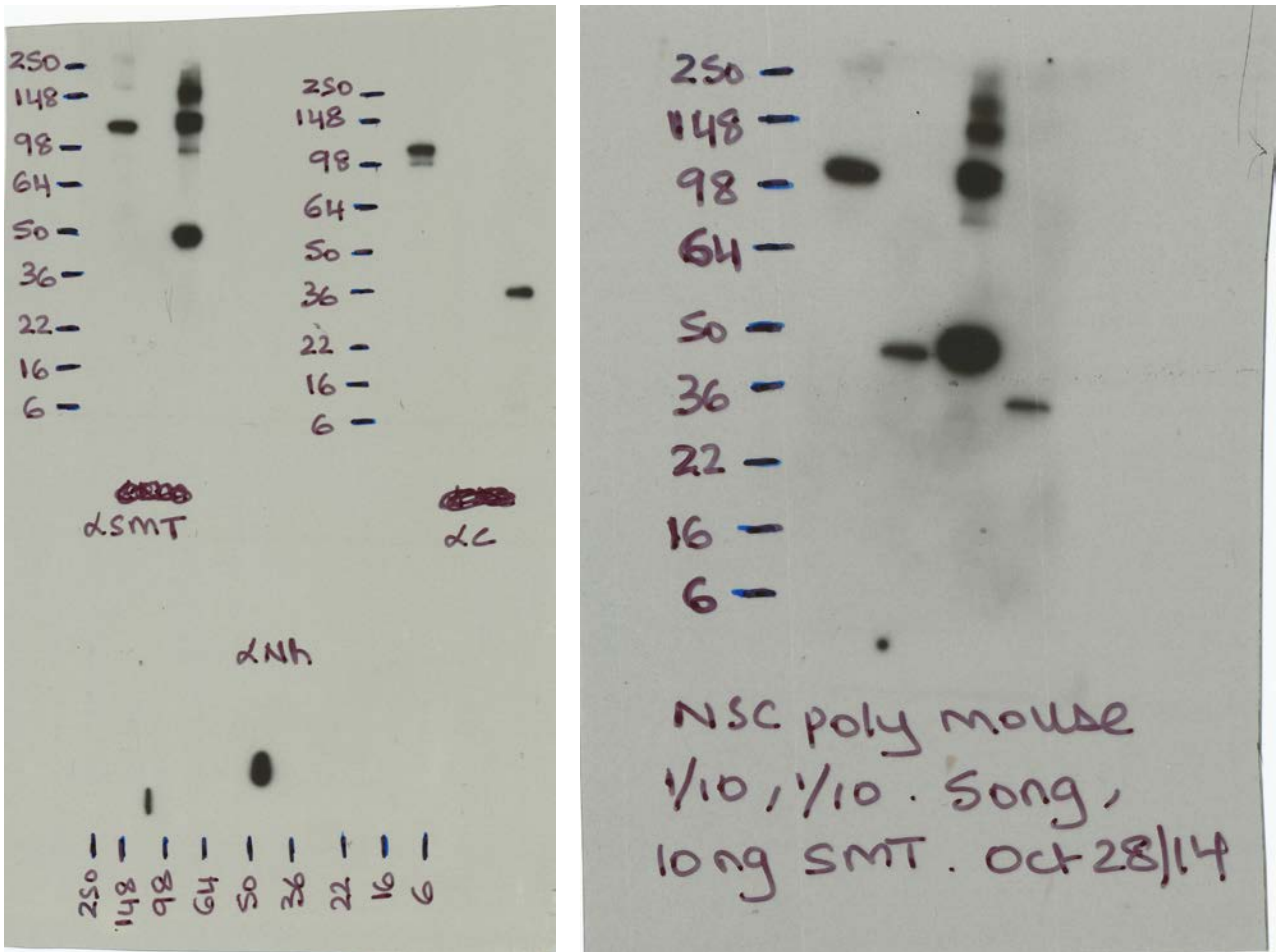

**Supplementary Figure 4. Characterization of the LEISH-F3+ fusion protein by immunoblot.** Recombinant LEISH-F3+ (lane 1), Nucleoside Hydrolase (NH; lane 2), Sterol-24-c-methyl-transferase (SMT; lane 3) or truncated Cysteine Protease B protein ( $\Delta$ CPB; lane 4); were loaded at 100ng each lane into gels. Blots were developed with mouse polyclonal or monoclonal antibodies as indicated, derived from the same original gel.
